# Supplementary material for: Solution plasma-cobalt hydroxide-enabled nitrogen fixation
Source: Royal Society of Chemistry journal article supplement (doi:10.1039/d4cc02102a), 2024-01-01
Supplement: d4cc02102a1.pdf [file d4cc02102a1.pdf]

## Supporting Information

### Solution plasma-cobalt hydroxide enabled nitrogen fixation

*Yangwenting Ou<sup>1</sup>, Jinglun Du<sup>1</sup>, Changhua Wang,\* Qi Wu, Shuang Liang, He Ma, Xintong Zhang\**

Key Laboratory of UV-Emitting Materials and Technology of Chinese Ministry of Education, Northeast Normal University, Changchun 130024, China

E-mail: wangch100@nenu.edu.cn; xtzhang@nenu.edu.cn

#### 1. Experimental:

1.1 Experimental facility: A quartz plasma reactor, positioned above a magnetic stirrer, is equipped with one hollow metal tungsten electrode (inner diameter 1 mm, outer diameter 3 mm) and one solid metal tungsten electrode (diameter 3 mm). It also features a cooling circulation water system that can control the reaction temperature to 10 °C. During the experiment, a nitrogen gas flow rate of 0.5 L min<sup>-1</sup> is introduced into 120 ml of pure water through the end of the hollow metal tungsten electrode. The high-frequency pulsed plasma system used has an output voltage of ±3.5 kV, a frequency of 60 kHz, and a pulse width of 3 μs. Concurrently, the plasma power source is activated to apply pulsed high voltage across the "needle-to-needle" electrodes.

1.2 Materials: Co(OH)<sub>2</sub> (99.9% metal basis, Aladdin Reagents), CoSO<sub>4</sub>·7H<sub>2</sub>O (99.9% metal basis, Aladdin Reagents), Co<sub>3</sub>O<sub>4</sub> (99.5%, Innochem Reagents), Ni(OH)<sub>2</sub> (61% Ni, Macklin Reagents), Fe(OH)<sub>3</sub>: 5 mmol of FeCl<sub>3</sub> (99.9% metal basis, Aladdin) was dissolved in 50 ml of ultrapure water, and 20 mmol of KOH (95%, Aladdin) was dissolved in 50 ml of ultrapure water. Then, the fully dissolved FeCl<sub>3</sub> solution was poured into the KOH solution and stirred. After stirring for 30 minutes, the suspension was transferred into centrifuge tubes and centrifuged at 9000 r min<sup>-1</sup> for 10 minutes. The supernatant was discarded, and the precipitate was washed twice. Finally, the centrifuge tubes were placed in an oven at 60 °C to dry, obtaining Fe(OH)<sub>3</sub> powder.

1.3 Synthesis of nanosized Co(OH)<sub>2</sub>: 5 mmol of CoSO<sub>4</sub>·7H<sub>2</sub>O was dissolved in 30 ml of ultrapure water, and 0.1 mol of KOH was dissolved in 20 ml of ultrapure water. The

fully dissolved  $\text{CoSO}_4$  solution was then poured into the KOH solution and stirred. After stirring for 30 minutes, the suspension was transferred into three 50 ml polytetrafluoroethylene autoclaves and hydrothermally treated at 100 °C for 8 hours. Afterwards, the suspension was poured into centrifuge tubes and centrifuged at 9000  $\text{r min}^{-1}$  for 10 minutes. The supernatant was discarded, and the precipitate was washed twice. Finally, the centrifuge tubes were placed in an oven at 60 °C to dry, yielding  $\text{Co(OH)}_2$  powder.

#### 1.4 Measurement of $\text{NO}_2^-$ , $\text{NO}_3^-$ , and $\text{H}_2\text{O}_2$ :

The concentrations of  $\text{NO}_2^-$  and  $\text{NO}_3^-$  in plasma-activated water were quantitatively analyzed using a Shimadzu Ion Chromatograph (LC-20AD) equipped with an IC-GA3 guard column and an IC-A3 analytical column. The Ion chromatograms of  $\text{NO}_2^-$  and  $\text{NO}_3^-$  were shown in Figure S2, the peak emergence time for  $\text{NO}_2^-$  was around 5 minutes, and its concentration was determined by inserting the peak area into the standard curve  $y=6.19677\text{E}-6x+0.00184$ . The peak emergence time for  $\text{NO}_3^-$  was around 6.7 minutes, and its concentration was determined using the standard curve  $y=6.70127\text{E}-6x+0.0093$ , with the concentration unit being  $\text{mmol L}^{-1}$ .

The concentration of  $\text{H}_2\text{O}_2$  in plasma-activated water was quantitatively measured using a Shimadzu UV-Visible Spectrophotometer (UV2600) with a wavelength range of 190-900 nm. Three solutions were prepared: Solution A: 0.1 g of N,N-diethyl-p-phenylenediamine was dissolved in 10 mL of 0.05  $\text{mol L}^{-1}$  sulfuric acid solution; Solution B: 0.01 g of peroxidase was dissolved in 10 mL of ultrapure water; Solution C: 0.1  $\text{mol L}^{-1}$   $\text{Na}_2\text{HPO}_4$  solution and 0.1  $\text{mol L}^{-1}$   $\text{NaH}_2\text{PO}_4$  solution were mixed in a volume ratio of 1:9 and stirred until homogeneous. 6 mL of Solution C was added to 100  $\mu\text{L}$  of the sample, followed by the sequential addition of 100  $\mu\text{L}$  of Solution A and Solution B, and the mixture was shaken to ensure uniform mixing. The absorbance data at a wavelength of 552 nm was inserted into the standard curve  $y=0.000387987x-0.04838$  to obtain the concentration of  $\text{H}_2\text{O}_2$ , with the unit being  $\mu\text{mol L}^{-1}$ .

#### 1.5 Characterization:

The voltage and current signals of liquid-phase plasma discharge were recorded using a GW Instek GDS-2202A digital oscilloscope equipped with a high-voltage probe

and an electromagnetic induction ring. The actual power  $P$  required for discharge was determined by plotting the I-V curve and integrating the curve. The energy consumed during the discharge process was then calculated using the formula Energy Consumption ( $\text{J mol}^{-1}$ ) =  $P(\text{W}) * T(\text{s}) * n^{-1}$  ( $\text{mol}^{-1}$ ).

The optical emission spectroscopy (OES) signals during the liquid-phase plasma discharge process were detected using an Ocean Optics spectrometer (NOVA-EX 400-001-5685). The concentration changes of  $\text{H}^+$  in the solution were measured using a Mettler Toledo FE28-Standard pH meter (testing range 0.00-14.00, resolution 0.01, accuracy  $\pm 0.01$ ). ESR measurements for  $\text{DMPO}\cdot\text{OH}$  and  $\text{DMPO}\cdot\text{H}$  signals were conducted on a Bruker EMXnano spectrometer (298 K, 9.63 GHz). X-ray diffraction patterns were collected using a Rigaku D/MAX-2500 with filtered  $\text{Cu-K}\alpha$  radiation to measure the crystal structure of the materials. The surface morphology and size of the materials were observed and measured using a JEOL JSM 4800F. The chemical composition and elemental states of the material surfaces were analyzed using XPS (Thermo SCIENTIFIC ESCALAB 250Xi), with the excitation source being Al target  $\text{K}\alpha$  radiation. The binding energy was calibrated using the  $\text{C1s}$  peak (284.8 eV) of adventitious carbon contamination. In-situ Infrared Spectroscopy measurements were performed using a Thermo Scientific Nicolet IS10 spectrometer.  $\text{NO}$  gas passed through water at a flow rate of  $150 \text{ mL min}^{-1}$  was introduced into the reactor to record the changes in the adsorption state of  $\text{NO}_x$  on the material surface at different times.

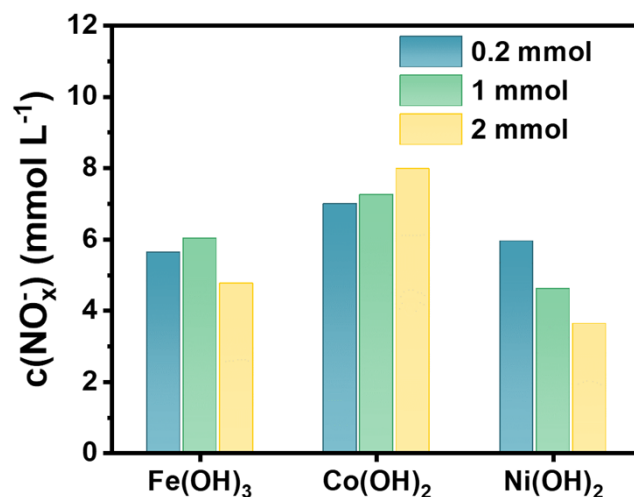

Figure S1. Concentrations of  $\text{NO}_x^-$  produced after 120 minutes of discharge with the addition of different doses of  $\text{Fe}(\text{OH})_3$ ,  $\text{Co}(\text{OH})_2$  and  $\text{Ni}(\text{OH})_2$ .

We Added 0.2 mmol, 1 mmol and 2 mmol of metal hydroxides to the system respectively. It was found that  $\text{Co}(\text{OH})_2$  consistently exhibited the best nitrogen fixation performance when different doses of additives were added.

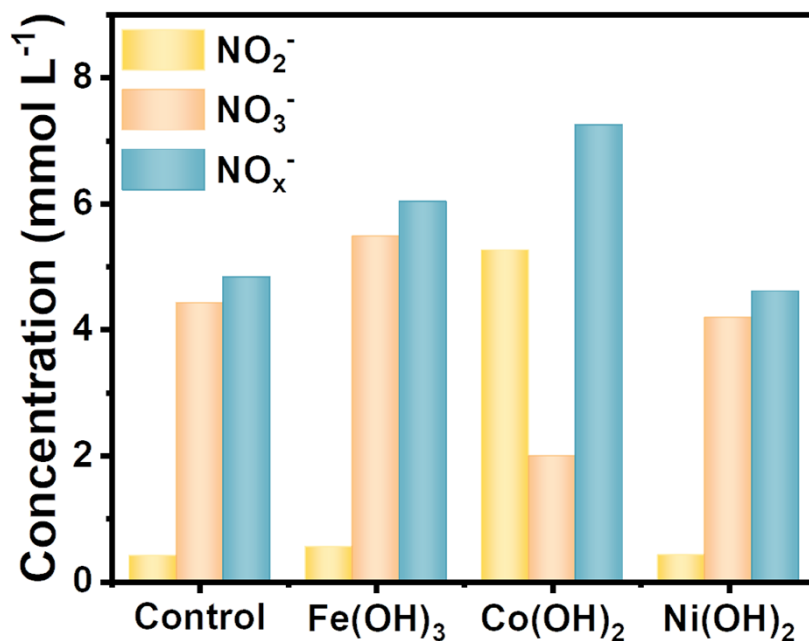

Figure S2. Concentrations of  $\text{NO}_2^-$ ,  $\text{NO}_3^-$ , and  $\text{NO}_x^-$  produced after 120 minutes of discharge with the addition of 1 mmol of different metal hydroxides.

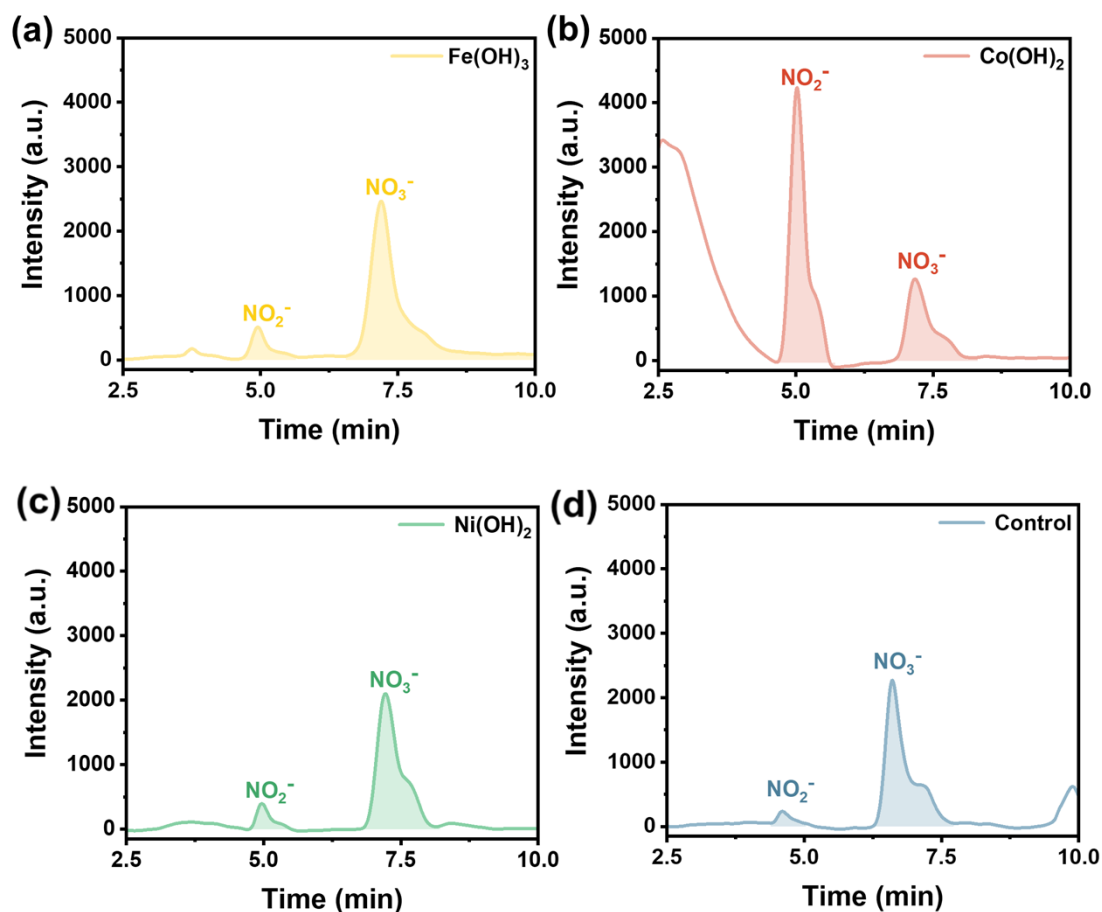

Figure S3. Ion chromatograms of  $\text{NO}_2^-$  and  $\text{NO}_3^-$  produced after 120 minutes of discharge with the addition of 1 mmol of (a)  $\text{Fe(OH)}_3$ , (b)  $\text{Co(OH)}_2$ , (c)  $\text{Ni(OH)}_2$ , and (d) in pure water.

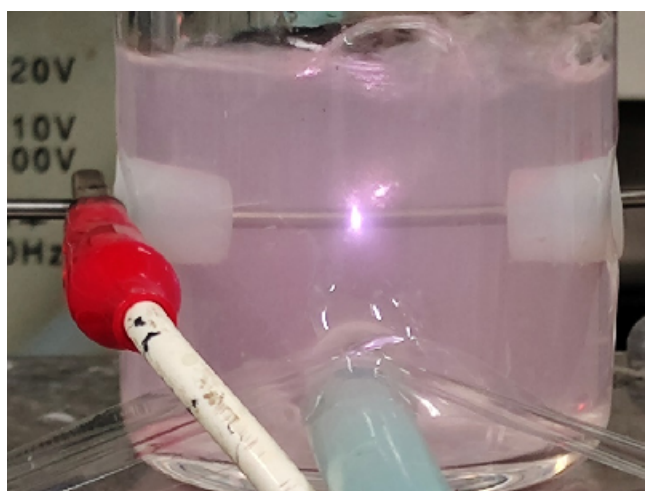

Figure S4. Pictures of the solution during discharge with the addition of 1 mmol  $\text{Co(OH)}_2$ .

Table S1. Ratios of each RNS and ROS peak to the reference peak ( $\text{H}\alpha$ ).

|                          | RNS<br>337 nm | RNS<br>355 nm | RNS<br>747 nm | RNS<br>868 nm | ROS<br>778nm | ROS<br>822nm |
|--------------------------|---------------|---------------|---------------|---------------|--------------|--------------|
| Control                  | 0.01          | 0.01          | 0.04          | 0.12          | 0.46         | 0.11         |
| $\text{Ni}(\text{OH})_2$ | 0.12          | 0.00          | 0.09          | 0.28          | 0.49         | 0.21         |
| $\text{Fe}(\text{OH})_3$ | 0.09          | 0.01          | 0.08          | 0.3           | 0.6          | 0.17         |
| $\text{Co}(\text{OH})_2$ | 0.18          | 0.04          | 0.15          | 0.51          | 0.57         | 0.26         |

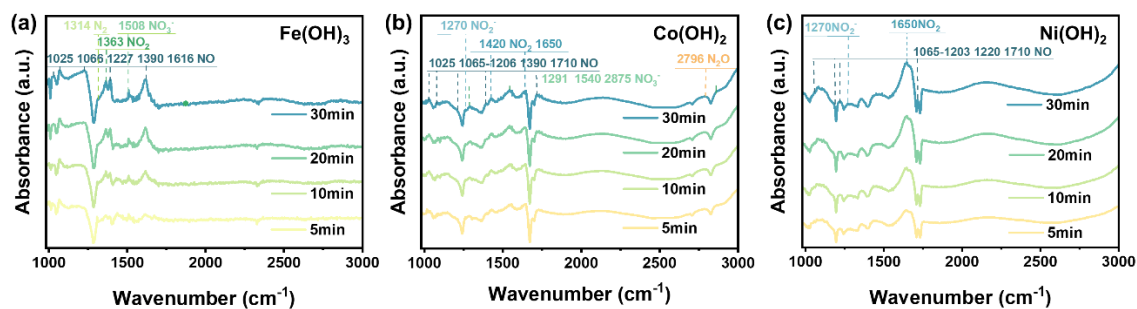

Figure S5. In-situ infrared spectra of (a)  $\text{Fe}(\text{OH})_3$ , (b)  $\text{Co}(\text{OH})_2$ , (c)  $\text{Ni}(\text{OH})_2$ .

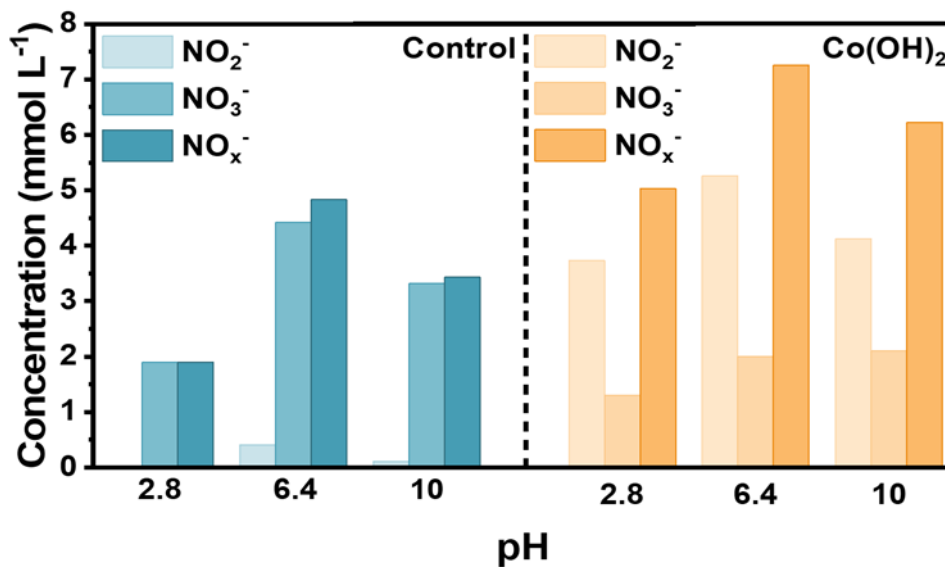

Figure S6. Concentrations of  $\text{NO}_2^-$ ,  $\text{NO}_3^-$ , and  $\text{NO}_x^-$  produced after 120 minutes of discharge in pure water and with the addition of 1 mmol  $\text{Co}(\text{OH})_2$  at different initial pH values.

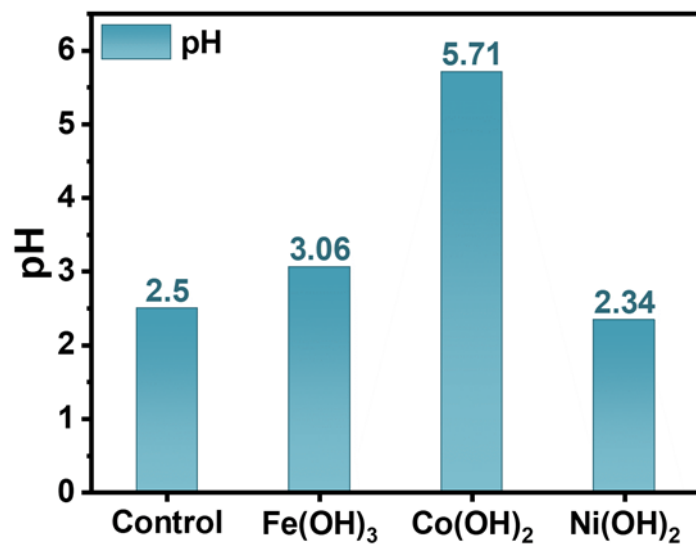

Figure S7. pH values after discharge in pure water and with the addition of 1 mmol of various catalysts.

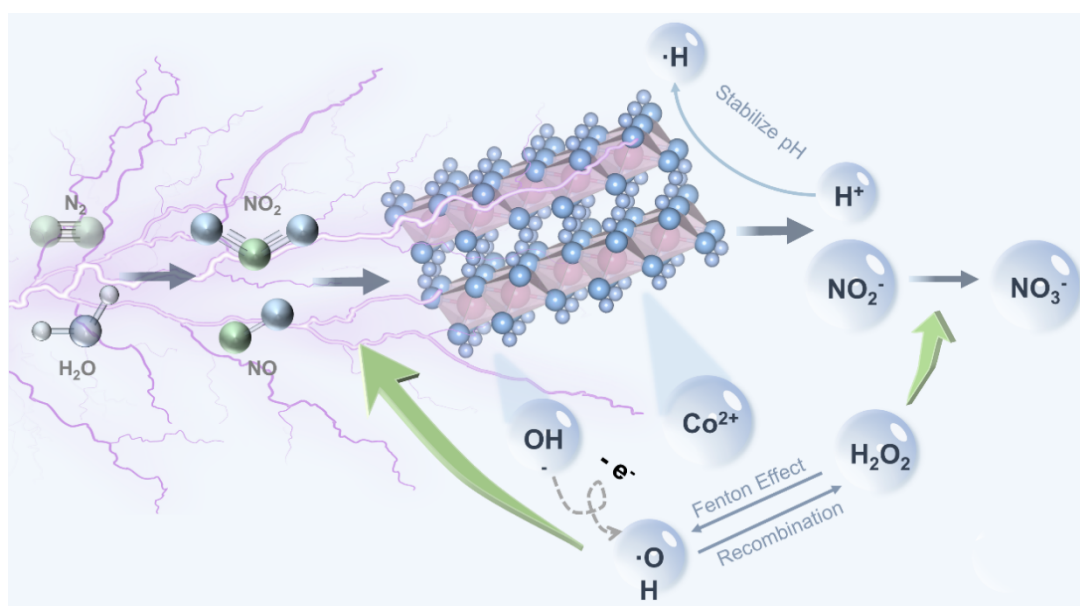

Figure S8. Mechanism diagram for the promotion of nitrogen fixation by Co(OH)<sub>2</sub>.

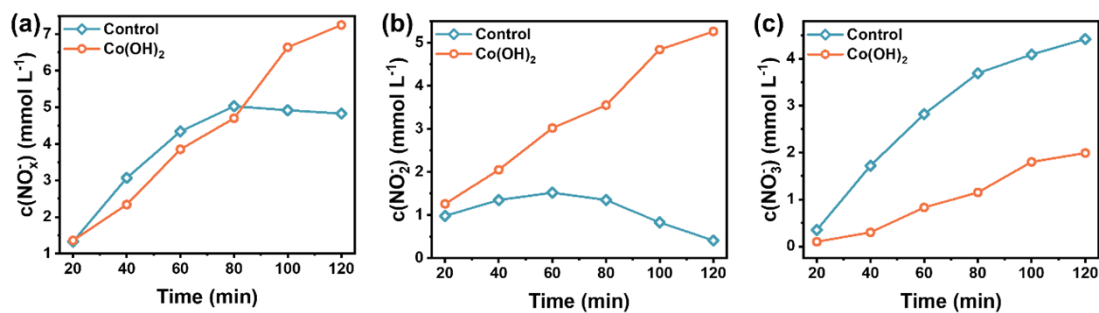

Figure S9. Changes in the concentrations of (a)  $\text{NO}_x^-$ , (b)  $\text{NO}_2^-$  and (c)  $\text{NO}_3^-$  within 120 min with the addition of 1 mmol  $\text{Co}(\text{OH})_2$  discharge.

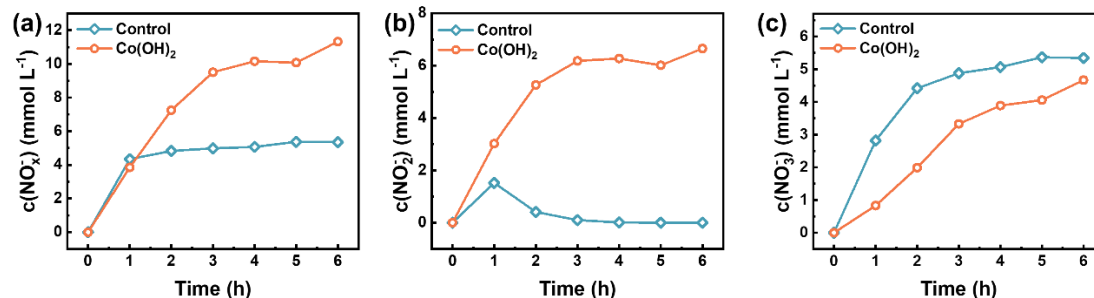

Figure S10. Changes in the concentrations of (a)  $\text{NO}_x^-$ , (b)  $\text{NO}_2^-$  and (c)  $\text{NO}_3^-$  within 6 h with the addition of 1 mmol  $\text{Co}(\text{OH})_2$  discharge.

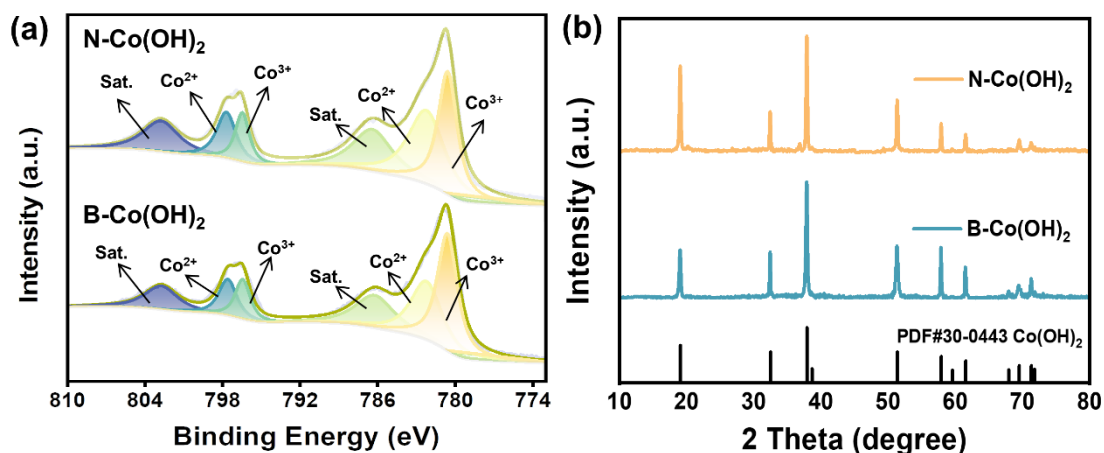

Figure S11 (a) XPS spectra comparison between N- $\text{Co}(\text{OH})_2$  and B- $\text{Co}(\text{OH})_2$ , (b) XRD comparison between N- $\text{Co}(\text{OH})_2$  and B- $\text{Co}(\text{OH})_2$ .

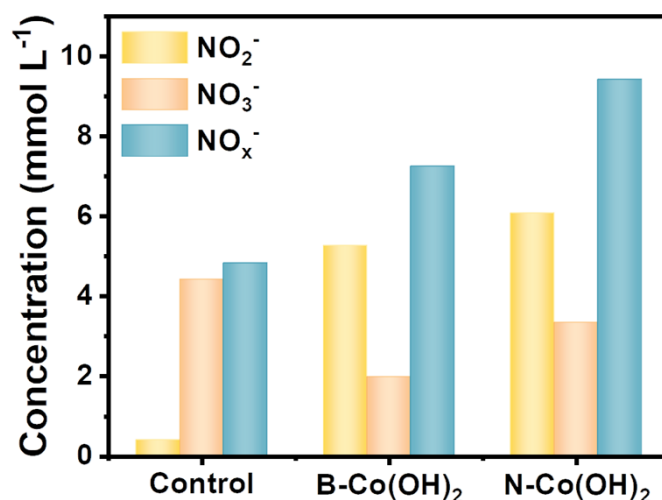

Figure S12. Concentrations of  $\text{NO}_2^-$ ,  $\text{NO}_3^-$ , and  $\text{NO}_x^-$  produced after 120 minutes of



discharge with the addition of 1 mmol of B-Co(OH)<sub>2</sub> and N-Co(OH)<sub>2</sub>.

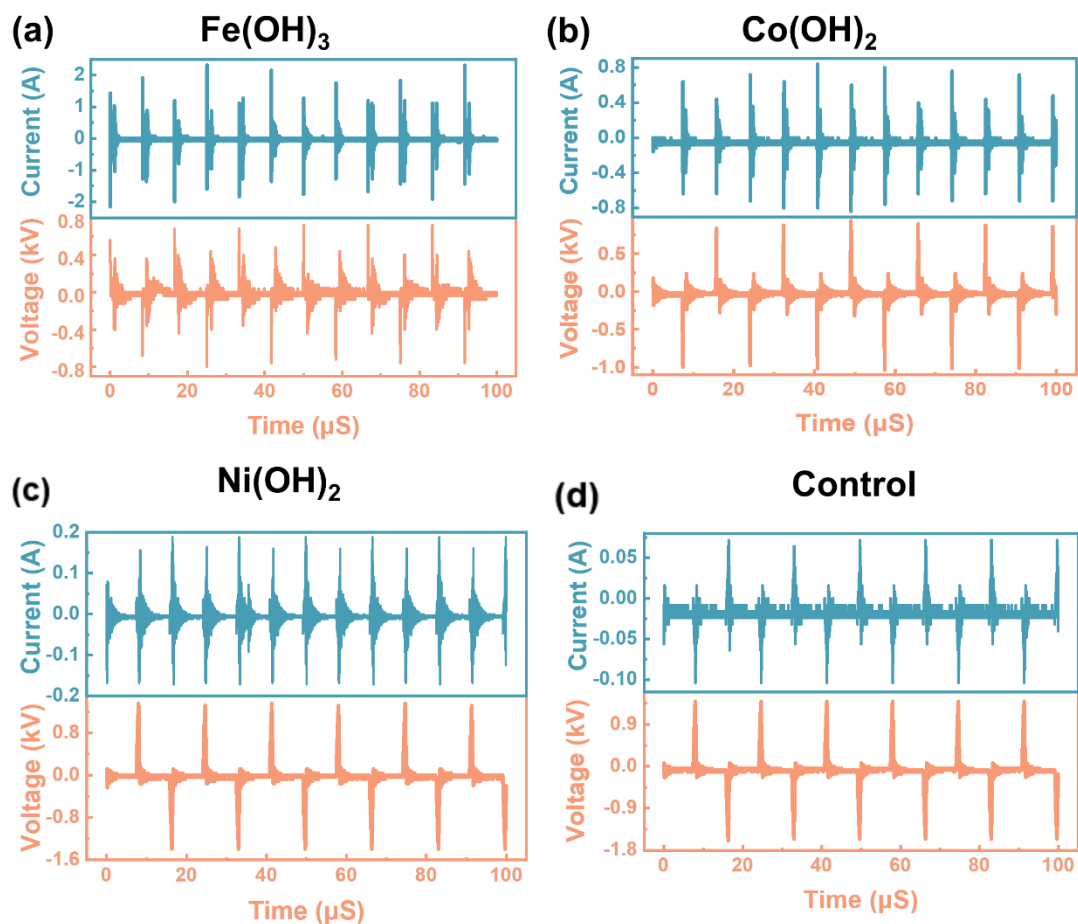

Figure S13. I-V curves during discharge with the addition of 1 mmol of (a) Fe(OH)<sub>3</sub>, (b) Co(OH)<sub>2</sub>, (c) Ni(OH)<sub>2</sub> and (d) in pure water.

Table S2. The actual power P during discharge.

|       | Control | Fe(OH) <sub>3</sub> | Co(OH) <sub>2</sub> | Ni(OH) <sub>2</sub> |
|-------|---------|---------------------|---------------------|---------------------|
| Power | 7.46 W  | 5.66 W              | 4.21 W              | 5.82 W              |

Table S3. A comparison of NO<sub>x</sub><sup>-</sup> production rates between this work and other studies.

|                  | Catalyst                                    | Production rate (μmol g <sup>-1</sup> h <sup>-1</sup> )            |
|------------------|---------------------------------------------|--------------------------------------------------------------------|
| Photocatalysis   | Pd/H-TiO <sub>2</sub>                       | 4.58 <sup>1</sup>                                                  |
|                  | WO <sub>3</sub> /CdS                        | 14.2 <sup>2</sup>                                                  |
|                  | Pothole-rich WO <sub>3</sub>                | 32 <sup>3</sup>                                                    |
|                  | TiO <sub>2</sub> /WO <sub>3</sub>           | 160 <sup>4</sup>                                                   |
| Electrocatalysis | Ru-doped TiO <sub>2</sub> /RuO <sub>2</sub> | 161.9 <sup>5</sup>                                                 |
|                  | Rh                                          | 168 <sup>6</sup>                                                   |
|                  | AD-Fe NS                                    | 6120 <sup>7</sup>                                                  |
|                  | Ru-doped Pd                                 | (2.45 μmol cm <sup>-2</sup> h <sup>-1</sup> )<br>77.7 <sup>8</sup> |

---

This Work

Co(OH)<sub>2</sub>

6077.42  
(6280 μmol cm<sup>-2</sup> h<sup>-1</sup>)

---

References:

1. X. Zhang, R. Shi, Z. Li, J. Zhao, H. Huang, C. Zhou and T. Zhang, *Adv. Energy Mater.*, 2022, **12**, 2103740.
2. P. Xia, X. Pan, S. Jiang, J. Yu, B. He, P. M. Ismail, W. Bai, J. Yang, L. Yang, H. Zhang, M. Cheng, H. Li, Q. Zhang, C. Xiao and Y. Xie, *Adv. Mater.*, 2022, **34**, 2200563.
3. Y. Liu, M. Cheng, Z. He, B. Gu, C. Xiao, T. Zhou, Z. Guo, J. Liu, H. He, B. Ye, B. Pan and Y. Xie, *Angew. Chem. Int. Ed.*, 2019, **58**, 731-735.
4. Y. Yu, C. Wang, Y. Yu, Y. Huang, C. Liu, S. Lu and B. Zhang, *J. Mater. Chem. A*, 2020, **8**, 19623-19630.
5. M. Kuang, Y. Wang, W. Fang, H. Tan, M. Chen, J. Yao, C. Liu, J. Xu, K. Zhou and Q. Yan, *Adv. Mater.*, 2020, **32**, 2002189.
6. T. Li, S. Han, C. Cheng, Y. Wang, X. Du, Y. Yu and B. Zhang, *Angew. Chem. Int. Ed.*, 2022, **61**, e202204541.
7. Y. Guo, S. Zhang, R. Zhang, D. Wang, D. Zhu, X. Wang, D. Xiao, N. Li, Y. Zhao, Z. Huang, W. Xu, S. Chen, L. Song, J. Fan, Q. Chen and C. Zhi, *ACS Nano*, 2022, **16**, 655-663.
8. T. Li, S. Han, C. Wang, Y. Huang, Y. Wang, Y. Yu and B. Zhang, *ACS Catal.*, 2021, **11**, 14032-14037.
